# Supplementary material for: Metabolic Regulation and Lipidomic Remodeling in Relation to Spermidine-induced Stress Tolerance to High Temperature in Plants
Source: MDPI journal article supplement (doi:10.3390/ijms232012247), 2022-10-13
Supplement: s1 [file s1]

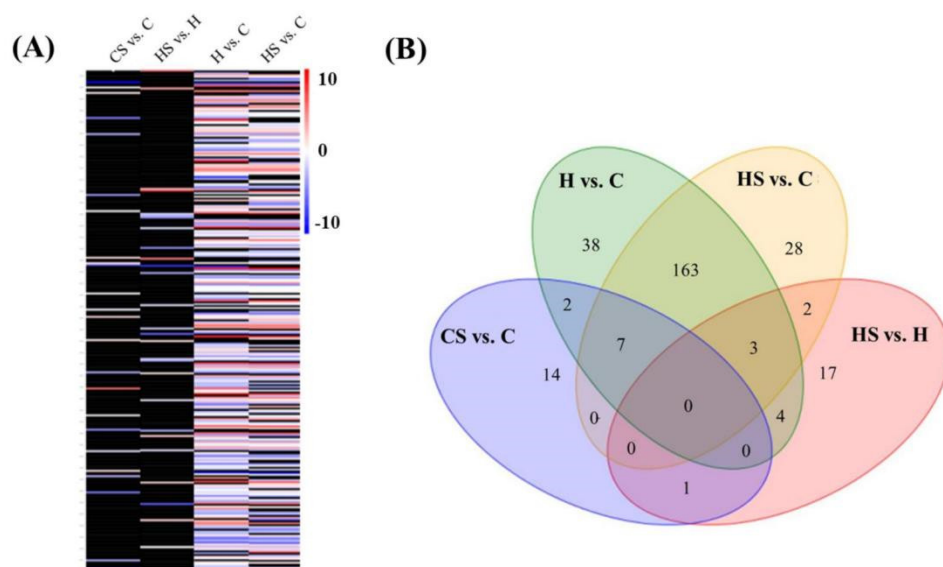

**Figure S1.** Heat map (A) and Venn diagram (B) of differentially accumulated metabolites (DAMs) in leaf of white clover in response to exogenous application of spermidine and heat stress. C, control; CS, control+spermidine; H, heat stress; HS, heat stress+spermidine.

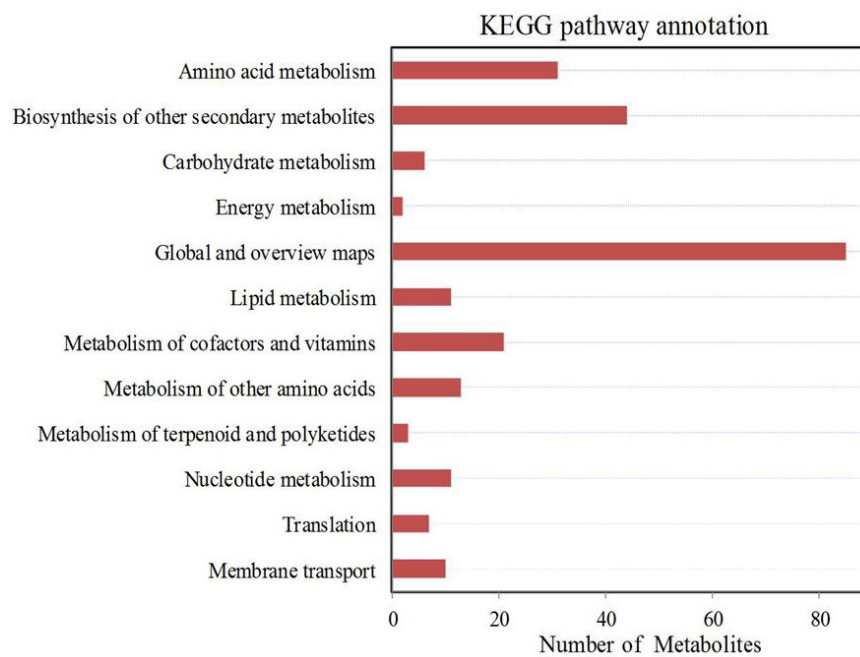

**Figure S2.** Kyoto Encyclopedia of Genes and Genomes (KEGG) function annotation of all identified metabolites in leaf of white clover in response to exogenous application of spermidine and heat stress.

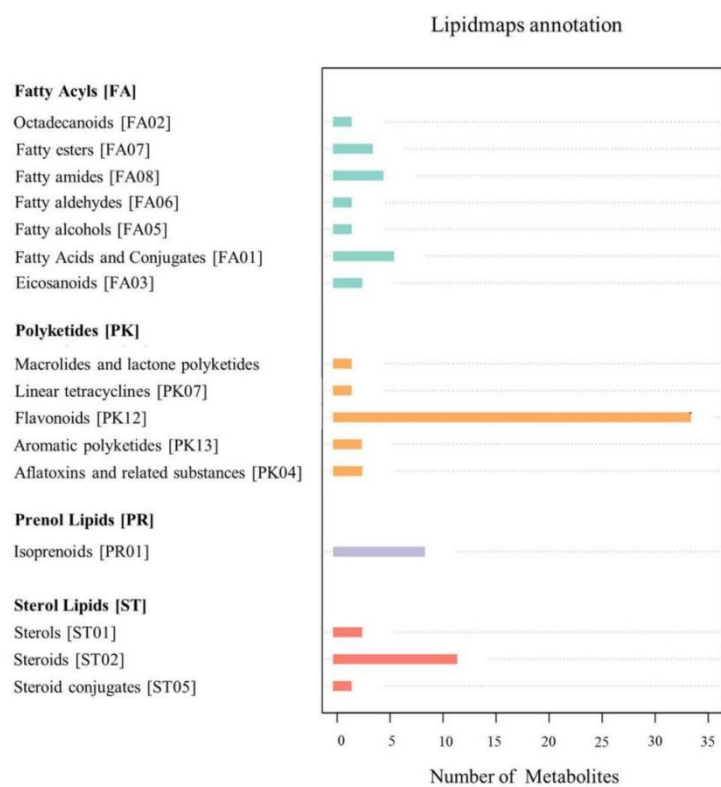

**Figure S3.** Lipid maps of all identified metabolites in leaf of white clover in response to exogenous application of spermidine and heat stress.

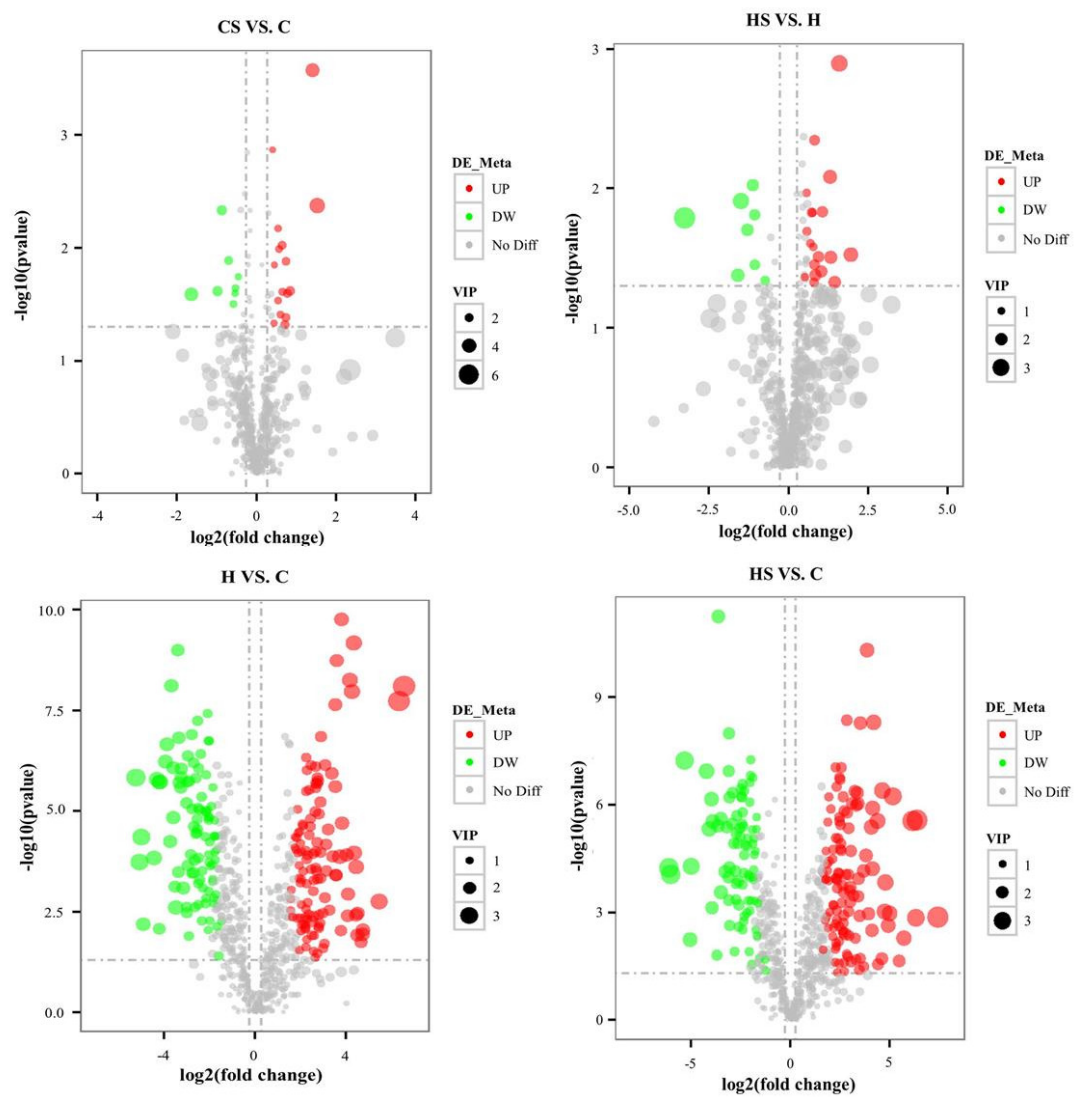

**Figure S4.** Volcano plot of identified differentially expressed metabolites in leaf of white clover in response to exogenous application of spermidine and heat stress. C, control; CS, control+spermidine; H, heat stress; HS, heat stress+spermidine.

**Table S1.** Primer sequences and their corresponding GeneBank accession numbers of genes involved in lipid metabolism.

| Target Gene         | Accession No.  | Forward Primer (5'-3')  | Reverse Primer (5'-3') | Tm/°C |
|---------------------|----------------|-------------------------|------------------------|-------|
| <i>AtACT2</i>       | NP_188508.1    | AATTACCCGATGGGC A       | TCATACTCGGCCTTGGA      | 58    |
| <i>AtPI4K alpha</i> | NM_180629.2    | ATCGTTCCGCCGTTTCCTTC    | ATCCCCGTCGCTATCACCA    | 60    |
| <i>AtPIP5K1</i>     | AB005902.1     | GAGTGATTGAGAAGAAGACGAAG | CTCTCTACTTCTTCACCGAAAC | 58    |
| <i>AtPLC5</i>       | AF434167.2     | CGCTGATGAAATGCTTGAAA    | GCTGAATTCCTCATCCCAAA   | 58    |
| <i>AtDGK2</i>       | NM_001345610.1 | AAGCAAGTCTCGGACATGCCT   | TTCGTTTGTGCCCCGCCTAT   | 61    |
| <i>AtPLD delta</i>  | NP_567989.1    | CCGGCGATTGGGTAGATA      | AGCAATTCCCCAAGCGTCAT   | 58    |
